# Supplementary material for: Evaluation of diagnostic practices and treatment compliance for Chlamydia trachomatis and Neisseria gonorrhoeae in male patients at STD clinics in Southern China
Source: Research Square preprint supplement (doi:10.21203/rs.3.rs-8094254/v1), 2025-12-22
Supplement: Supplementary file 1 [file 8f14beeadf5b030cd6b4cc97.docx]

Supplementary File 1

**Diagnosis Information Collection Form**

Form ID (Barcode Label):

Hospital Name:

Outpatient Number:

Date of Visit: ____Year ____Month ____Day

**I. Basic Patient Demographic and Behavioral Information**

1. Gender: A.Male B.Female

2. Age：

3. Date of Birth：

4. Ethnicity: A.Han B.Minority (Please specify: ________ )

5. Address:

A.This city/country

B.This province (specify city: ________ )

C.Other province(specify: ________ )

6. Marital Status：

A.Unmarried

B.Married

C.Divorced

D.Widowed

E. Unknown

7. Education Level:

A.primary School

B.Junior High School

C.High School/Secondary Technical School

D.Associate Degree

E.Bachelor's Degree

F Master's Degree or higher

8. Occupation:

A.Commercial Service Personnel

B.Worker

C.Farmer

D.Civil Servant

E.Teacher

F.Medical Personnel

G.Student

H.Childcare Worker & Nanny

I.Catering/Food Industry

J.Retired Personnel

K.Homemaker/Unemployed

L.Other (Please specify: _____)

N.Unknown

9. Reason for Visit:

A.Genital area-related symptoms

B.High-risk sexual behavior

C.Partner with STI infection

D.Routine check-up

E.Other (Please specify: _____)

10.Primary Diagnosis for this Visit: __________

**II. *Neisseria gonorrhoeae* Infection Testing and Treatment**

1. Was a laboratory test for *Neisseria gonorrhoeae* performed this time:

A.Yes B.No (Skip to Section III)

2. Specimen (Swab) Collection Site(s):

A.Urethra B.Cervix C.Vagina D.Pharynx E.Rectal crypt

F. Eyelid G .Conjunctiva H.Other site (Please specify: _____)

3. *Neisseria gonorrhoeae* Laboratory Testing Method:

A.Smear stain microscopy

B.*Neisseria gonorrhoeae* culture

C.Nucleic Acid Test

D.Other (Please specify: _____)

4. *Neisseria gonorrhoeae* Laboratory Test Result:

A.Positive B.Negative C.Indeterminate

5.Treament Regimen：

| No. | Medication Name | Dosage  （/dose） | Frequency(dose/day) | Duration  （days） | Route of Adminstration  (IV Injection/IM Injection/Oral) |
| --- | --- | --- | --- | --- | --- |
|  |  |  |  |  |  |
|  |  |  |  |  |  |
|  |  |  |  |  |  |

**III. Genital *Chlamydia trachomatis* Infection Testing and Treatment**

1. Was a laboratory test for Genital *Chlamydia trachomatis* performed this time:

A.Yes B.No (Skip to Section IV)

2. Specimen (Swab) Collection Site(s):

A.Urethra B.Cervix C.Vagina D.Pharynx E.Rectal crypt F.Eyelid

G.Conjunctiva H.Other site (Please specify: _____)

3. Genital *Chlamydia trachomatis* Laboratory Testing Method:

A.Nucleic Acid Test B.Antigen Test C.Culture D.Antibody Test

E.Other (Please specify: _____)

4. Genital *Chlamydia trachomatis* Laboratory Test Result:

A Positive B.Negative C. Indeterminate

5. Treament Regimen：

| No. | Medication Name | Dosage  （/dose） | Frequency(dose/day) | Duration  （days） | Route of Adminstration  (IV Injection/IM Injection/Oral) |
| --- | --- | --- | --- | --- | --- |
|  |  |  |  |  |  |
|  |  |  |  |  |  |
|  |  |  |  |  |  |

**IV. Attending Physician Information**

1. Age: years

2. Gender: A.Male B.Female C.Other

3. Education:

A .Associate Degree or below

B.Bachelor's Degree

C Master's Degree

D Doctorate

4. Professional Title:

A.Resident Physician

B.Attending Physician

C.Associate Chief Physician

D.Chief Physician

E.Trainee/Visiting Staff

F.Other (Please specify: _____)

5. Department:

A.Dermatology & Venereology (STD Clinic)

B.Urology

C.Andrology/Male Department

D.Proctology

E.Obstetrics & Gynecology

F.Other (Please specify: _____)

6. Number of patients diagnosed with Gonorrhea in 2022: _____cases

7. Number of patients diagnosed with Chlamydia infection in 2022: _____cases

8. Number of Gonorrhea tests ordered in 2022: _____cases

9. Number of Chlamydia tests ordered in 2022: _____cases

**V. Hospital Information**

1. Hospital Grade:

A.Tertiary Grade A

B.Tertiary Grade B

C.Tertiary Grade C

D.Secondary Grade A

E.Secondary Grade B

F.Secondary Grade C

G.Primary

1. Hospital Type:

A.Public Hospital

B.Private Hospital

C.Other(please specify: _____)

3. *Neisseria gonorrhoeae* Testing Services Provided by the Hospital in 2022:

| Test Method | Available | Number of Tests(cases) | positive（cases） | Remarks |
| --- | --- | --- | --- | --- |
| Microscopy | 1 Yes 2 No |  |  |  |
| Culture | 1 Yes 2 No |  |  |  |
| Nucleic Acid Test | 1 Yes 2 No |  |  |  |
| Other: | 1 Yes 2 No |  |  |  |

4. *Chlamydia trachomatis* Testing Services Provided by the Hospital in 2022:

| Test Method | Available | Number of Tests(cases) | positive（cases） | Remarks |
| --- | --- | --- | --- | --- |
| Antigen Test | 1 Yes 2 No |  |  |  |
| Nucleic Acid Test | 1 Yes 2 No |  |  |  |
| Other: | 1 Yes 2 No |  |  |  |

5. Can Antimicrobial Susceptibility Testing be performed: A.Yes B.No

6. Number of Gonorrhea cases reported in 2022: _____cases

7. Number of Chlamydia infection cases reported in 2022: _____cases
